# Supplementary material
Source: PubMed Central journal article supplement (PMC5497784)
Supplement: NIHMS867128-supplement-1.pdf [file NIHMS867128-supplement-1.pdf]

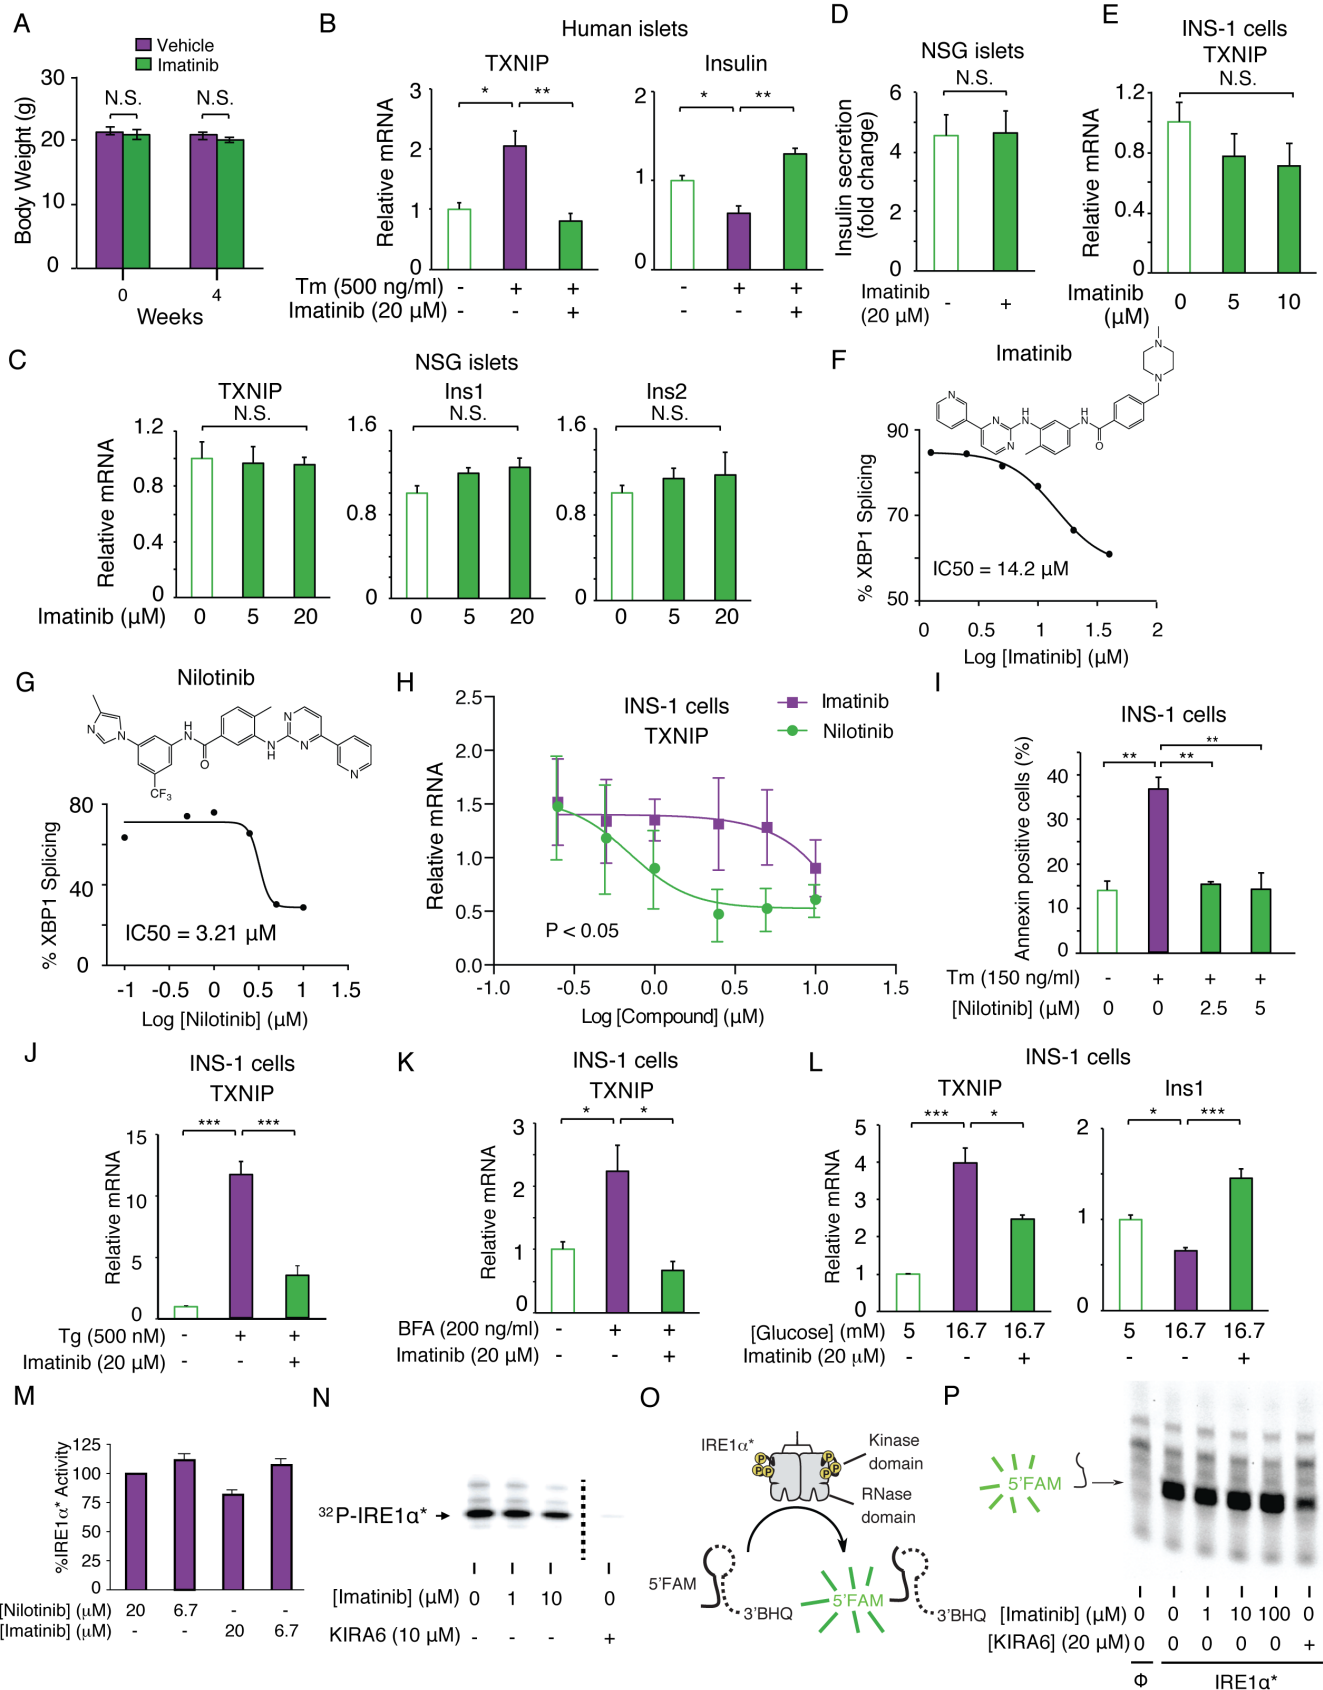

**FIGURE S1**

**Figure S1. Imatinib and nilotinib reduce ER stress-induced T-UPR endpoints to prevent  $\beta$ -cell death. Related to Figure 1 and 2.**

(A) Imatinib (1.5 mg/mouse) or vehicle was administered daily by oral gavage for 4 weeks in pre-diabetic NOD mice. Body mass before and after treatment is shown. 4 mice per group. (B) qPCR of relative TXNIP and Insulin mRNA levels in human islets pretreated for 2 hr with  $\pm$  imatinib, followed by  $\pm$  Tm for 16 hr. (C) In the absence of ER stress agents, levels of relative indicated mRNAs, by qPCR, from NSG islets treated for 8 hr with indicated [imatinib] remained unchanged. (D) In the absence of ER stress agents, glucose-stimulated insulin secretion from NSG islets treated  $\pm$  imatinib for 18 hr remained unchanged. [Glucose] was 2.5 mM or 28 mM for 30 min. Data shown as ratio of insulin levels at 28 mM over 2.5 mM glucose. (E) In the absence of ER stress agents, levels of relative TXNIP mRNA, by qPCR, in INS-1 cells treated for 6 hr with indicated [imatinib] remained unchanged. (F and G) % Spliced XBP1 in INS-1 cells pretreated with indicated [imatinib] (F) or [nilotinib] (G) for 4 hr, followed by 1  $\mu$ g/ml Tm for 4 hr. (H) qPCR of relative TXNIP mRNA levels in INS-1 cells pretreated with indicated [imatinib] or [nilotinib] for 4 hr, followed by treatment with 1  $\mu$ g/ml Tm for 8 hr. Two-way ANOVA was performed for statistical analysis. (I) Annexin V staining in INS-1 cells co-treated with Tm and indicated [nilotinib] for 48 hr. (J and K) qPCR of relative TXNIP mRNA levels in INS-1 cells pretreated with  $\pm$  imatinib for 2 hr, followed by Tg (J) or BFA (K) for 8 hr. (L) qPCR for relative TXNIP and Ins1 mRNA levels in INS-1 cells co-incubated with either 5 mM or 16.7 mM glucose and  $\pm$  imatinib for 72 hr. (M) Percent IRE1 $\alpha$ \* kinase activity in the presence of either nilotinib or imatinib at 20  $\mu$ M and 6.7  $\mu$ M relative to DMSO treated IRE1 $\alpha$ \*. Triplicated. (N) Autoradiogram showing the autophosphorylation of human WT IRE1 $\alpha$ \* under indicated [imatinib]. KIRA6 was used as a control. (O) 5' FAM-3' BHQ XBP1 mini-substrate used to measure RNase activity of IRE1 $\alpha$ . (P) Urea-PAGE of XBP1 RNA mini-substrate products cleaved by IRE1 $\alpha$ \* incubated with indicated [imatinib] or

KIRA6. Bars; mean±SEM. Three independent biological samples were used for qPCR, insulin secretion, and Annexin V staining. P-values: \* < 0.05, \*\* < 0.01, \*\*\* < 0.001.

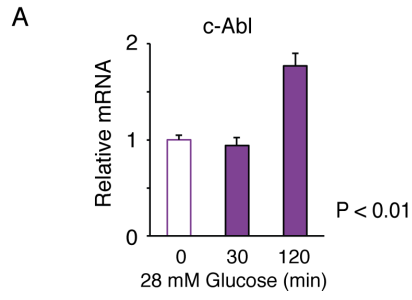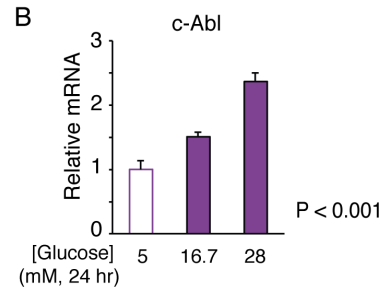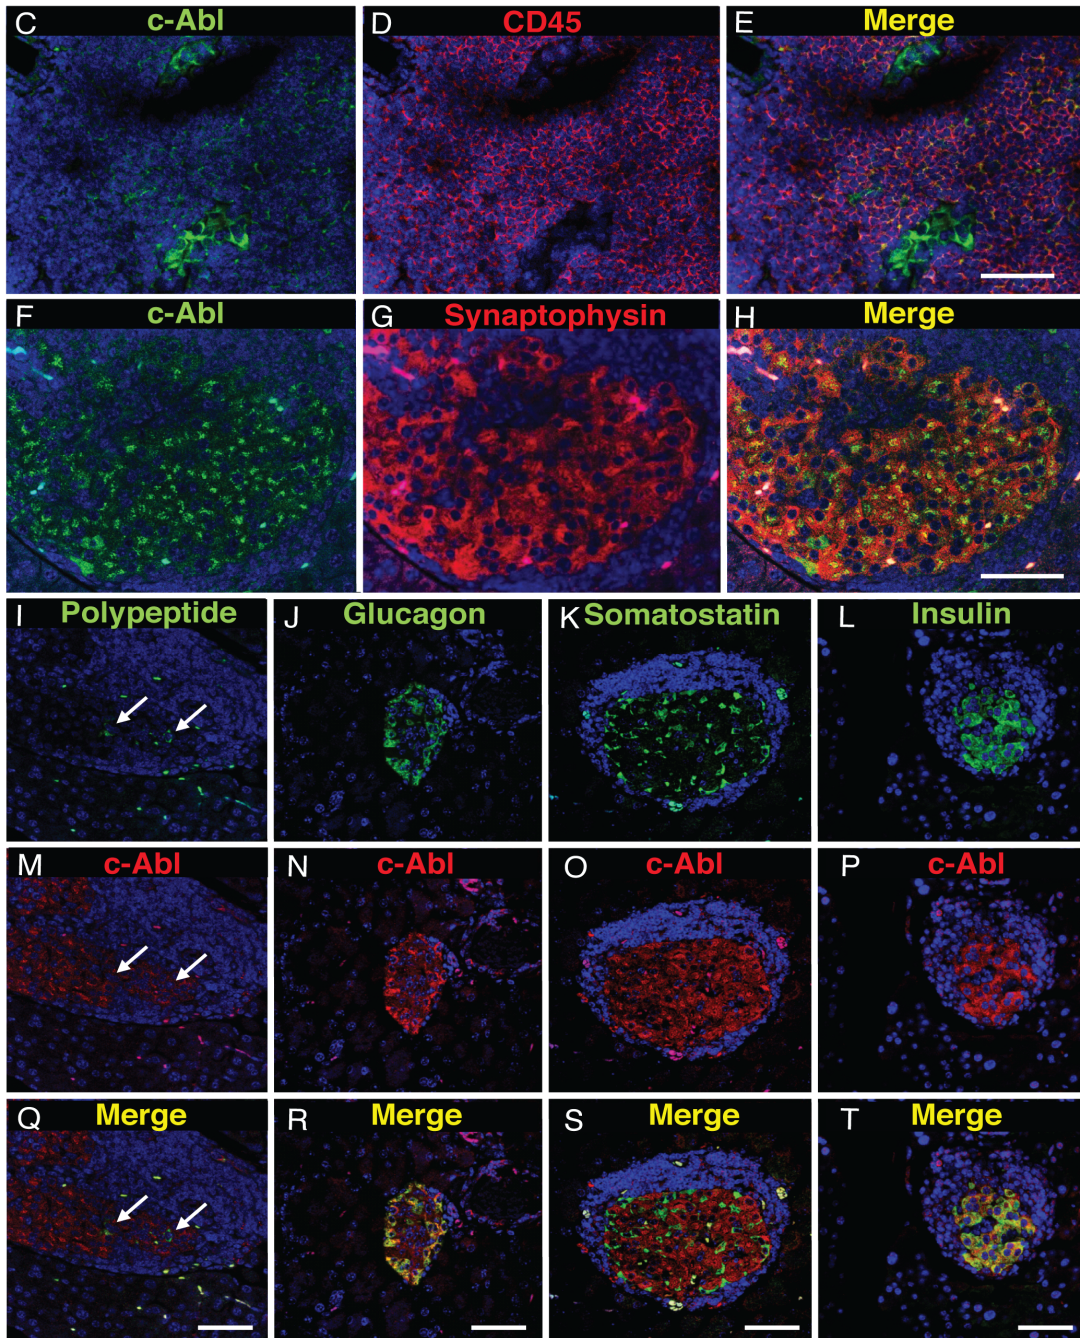

FIGURE S2

**Figure S2. Endocrine cells are the predominant source of c-Abl in the NOD pancreas. Related to**

**Figure 3.**

(A) qPCR for relative c-Abl mRNA levels in INS-1 cells treated with 5 mM glucose for 17 hr, and then treated with 28 mM glucose for the indicated time. One-way ANOVA with post-hoc test for trend was performed for statistical analysis. Biologically triplicated. (B) qPCR of relative c-Abl mRNA levels in INS-1 cells treated with indicated [glucose] for 24 hr. One-way ANOVA with post-hoc test for trend was performed for statistical analysis. Biologically triplicated. (C-E) Frozen sections of 12-week-old NOD pancreas were immunostained with antibodies specific for c-Abl (C, green) and CD45 (D, red). (F-H) Sections from formalin-fixed, 12-week-old NOD pancreas were stained with c-Abl (F, green) and synaptophysin (G, red) specific antibodies. (I-T) Identity of the endocrine cell expressing c-Abl was assessed by staining sections with antibodies specific for pancreatic polypeptide (I, green), glucagon (J, green), somatostatin (K, green) and insulin (L, green) and c-Abl (M-P, red). All images are representative of staining performed on 3 mice per cell-subset analyzed. Scale bar, 50  $\mu$ m. Arrows in (I), (M) and (Q) indicate pancreatic polypeptide positive cells. Autofluorescence of red blood cells can be detected in the green and red channels, but not in the blue channel.

A

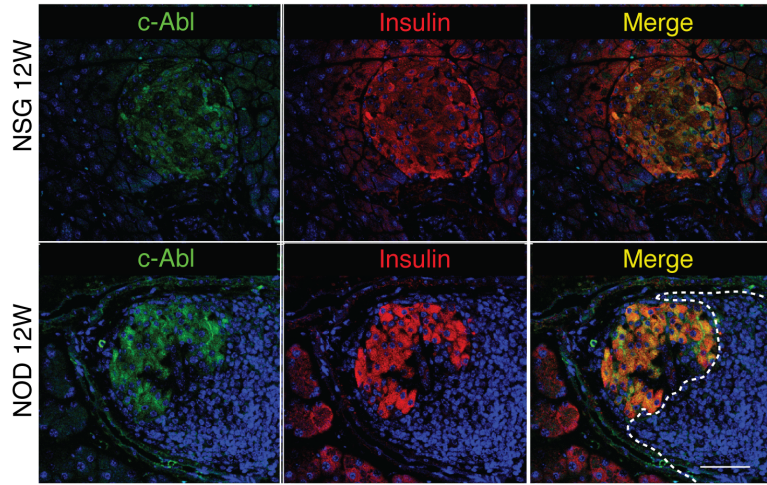

B

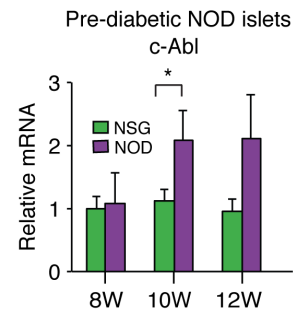

C

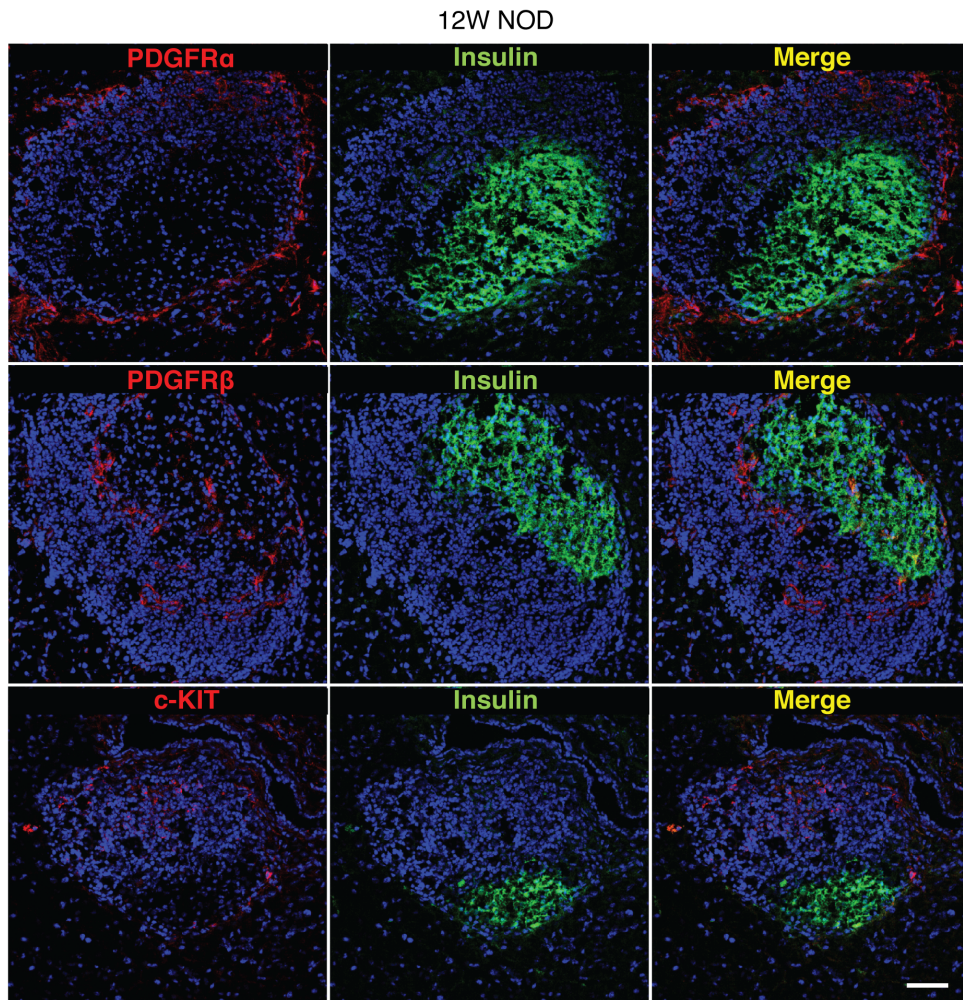

FIGURE S3

**Figure S3. c-Abl is induced in NOD  $\beta$ -cells; PDGFR and c-KIT are not expressed in  $\beta$ -cells.**

**Related to Figure 3.**

(A) Anti-c-Abl (green) and anti-proinsulin (red) immunofluorescence staining of tissue sections prepared from pancreata isolated from 12-week-old NSG and NOD mice that were fasted overnight. Images are representative of 5 mice from each group. Infiltrating cells delineated by dashed outline. Scale bar, 50  $\mu$ m. (B) qPCR for relative c-Abl mRNA levels in islets purified from pre-diabetic NOD and control NSG mice at the indicated ages. Two-way ANOVA followed by post-hoc Tukey's test was performed for statistical analysis. 3-7 mice per group. P-values: \* < 0.05. (C) Expression of the imatinib targets PDGFR $\alpha$  (top, red), PDGFR $\beta$  (middle, red) and c-KIT (bottom, red) in 12-week-old NOD pancreata was examined by immunofluorescence staining. Islets (anti-insulin staining) and nuclei (DAPI) are shown in green and blue, respectively.

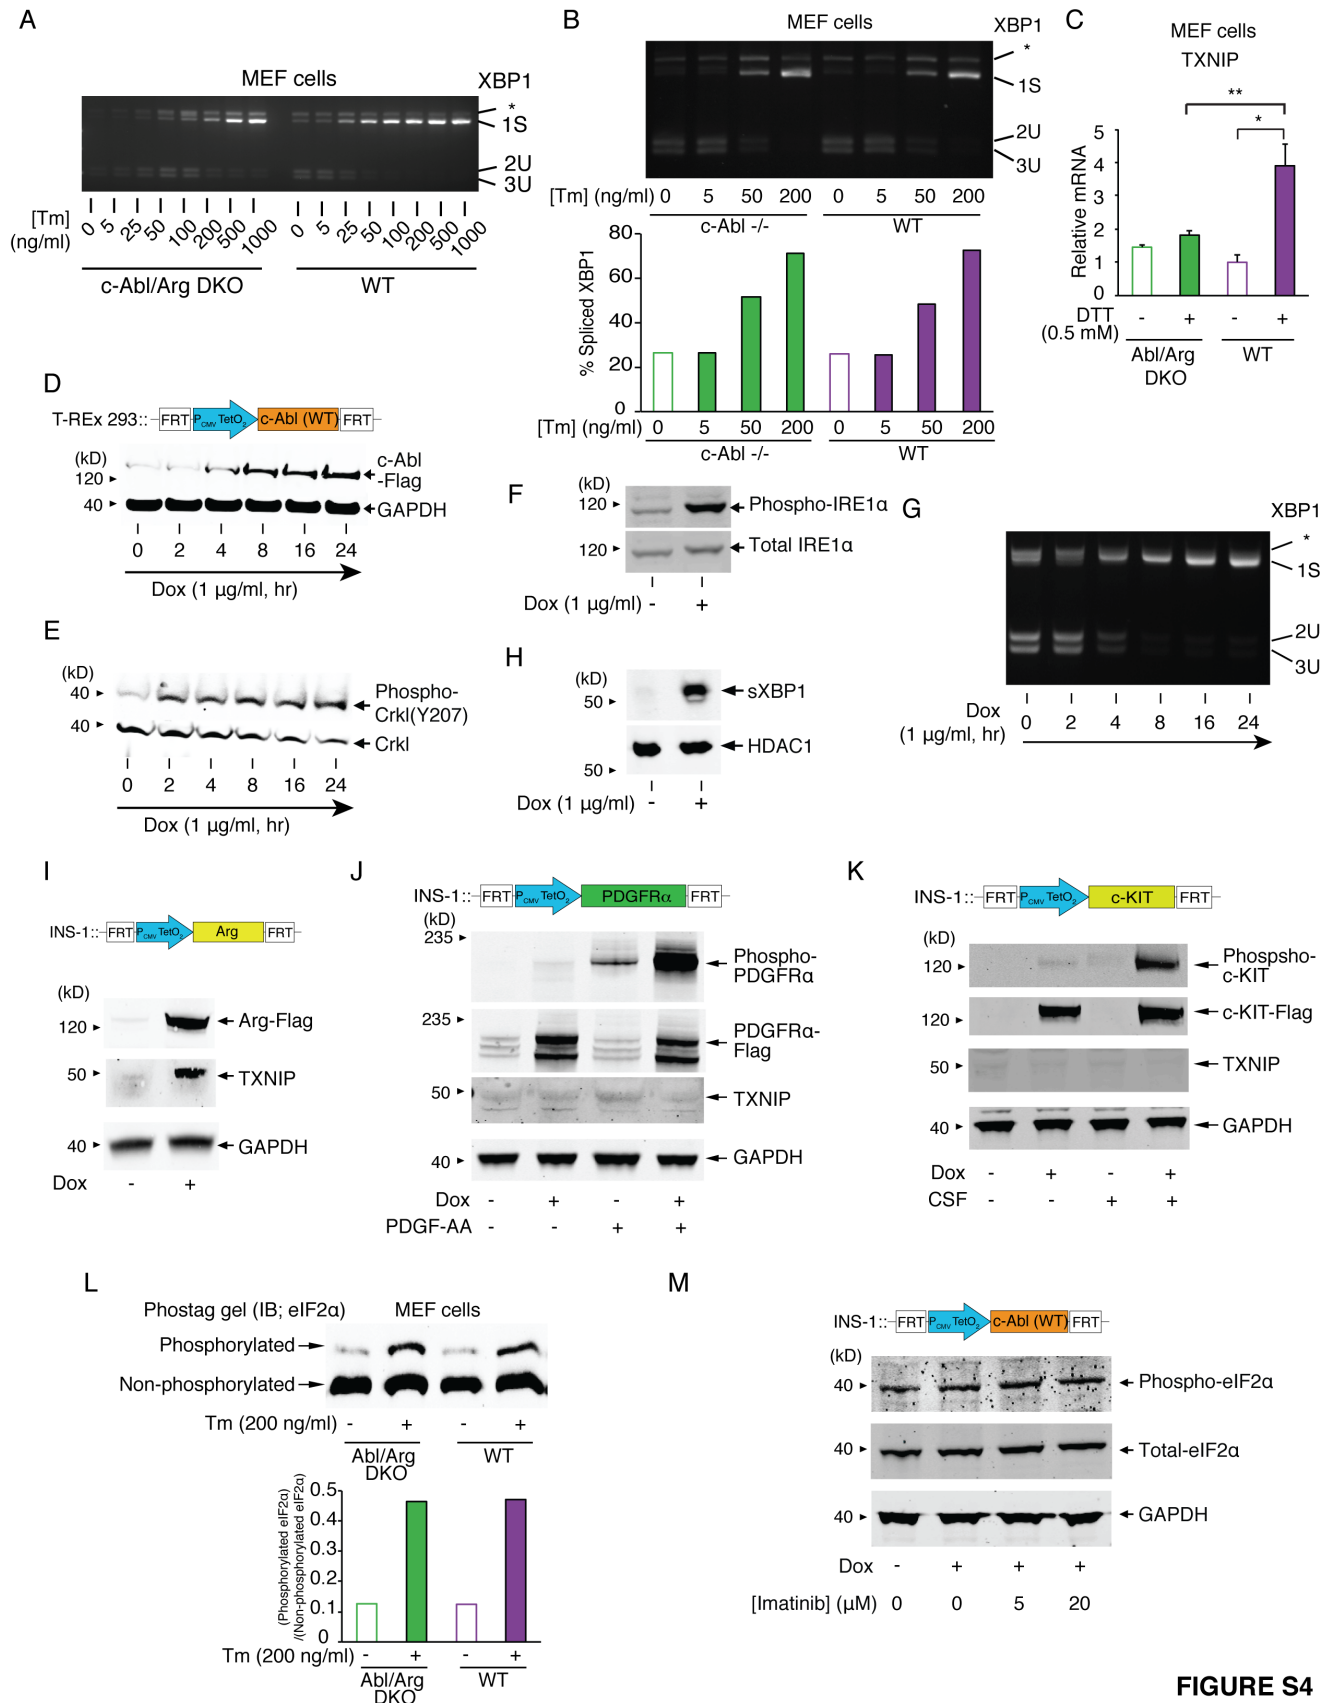

**FIGURE S4**



**Figure S4. ABL family tyrosine kinases are necessary and sufficient for driving T-UPR-mediated apoptosis through IRE1 $\alpha$ . Related to Figure 3.**

(A) Representative agarose gel of PstI-digested XBP1 cDNA amplicons in c-Abl/Arg DKO or WT MEF cells treated with the indicated [Tm] for 3 hr. Quantified % spliced XBP1 were in Figure 3D in triplicate. (B) Agarose gel of PstI-digested XBP1 cDNA amplicons from c-Abl  $-/-$  and WT MEF cells treated with indicated [Tm] for 3 hr. Quantification is shown at the bottom. (C) qPCR of relative TXNIP mRNA in c-Abl/Arg DKO or WT MEF cells treated with Dithiothreitol (DTT) for 3 hr. Two-way ANOVA followed by post-hoc Tukey's test was performed for statistical analysis. Biologically triplicated. Bars; mean $\pm$ SEM. P-values: \* < 0.05, \*\* < 0.01. (D-F, H) Immunoblots for indicated proteins in T-REx 293 cells stably expressing WT c-Abl under Dox for indicated times. Nuclear protein extract used for (H). (G) XBP1 cDNA amplicons from T-REx 293 cells expressing WT c-Abl under Dox for indicated times. (I) Immunoblots of indicated proteins in INS-1 cells expressing Arg under  $\pm$  1  $\mu$ g/ml Dox for 48 hr. (J) Immunoblots of indicated proteins in INS-1 cells expressing PDGFR $\alpha$  under  $\pm$  1  $\mu$ g/ml Dox for 48 hr. Cells were treated with  $\pm$  2 ng/ml PDGF-AA for 30 min before lysates were prepared. (K) Immunoblots of indicated proteins in INS-1 cells expressing c-KIT under  $\pm$  1  $\mu$ g/ml Dox for 48 hr. Cells were treated with  $\pm$  10 ng/ml SCF for 30 min before lysates were prepared. (L) Immunoblots of total eIF2 $\alpha$  in c-Abl/Arg DKO or WT MEF cells treated with Tm for 3 hr. Lysates were separated using Phostag Gel. Quantification of phosphorylated-/non-phosphorylated-eIF2 $\alpha$  signal intensity of blots is at the bottom. (M) Immunoblots of phospho- and total eIF2 $\alpha$  in INS-1 cells expressing c-Abl (WT) under 1  $\mu$ g/ml Dox  $\pm$  indicated [imatinib] for 72 hr.

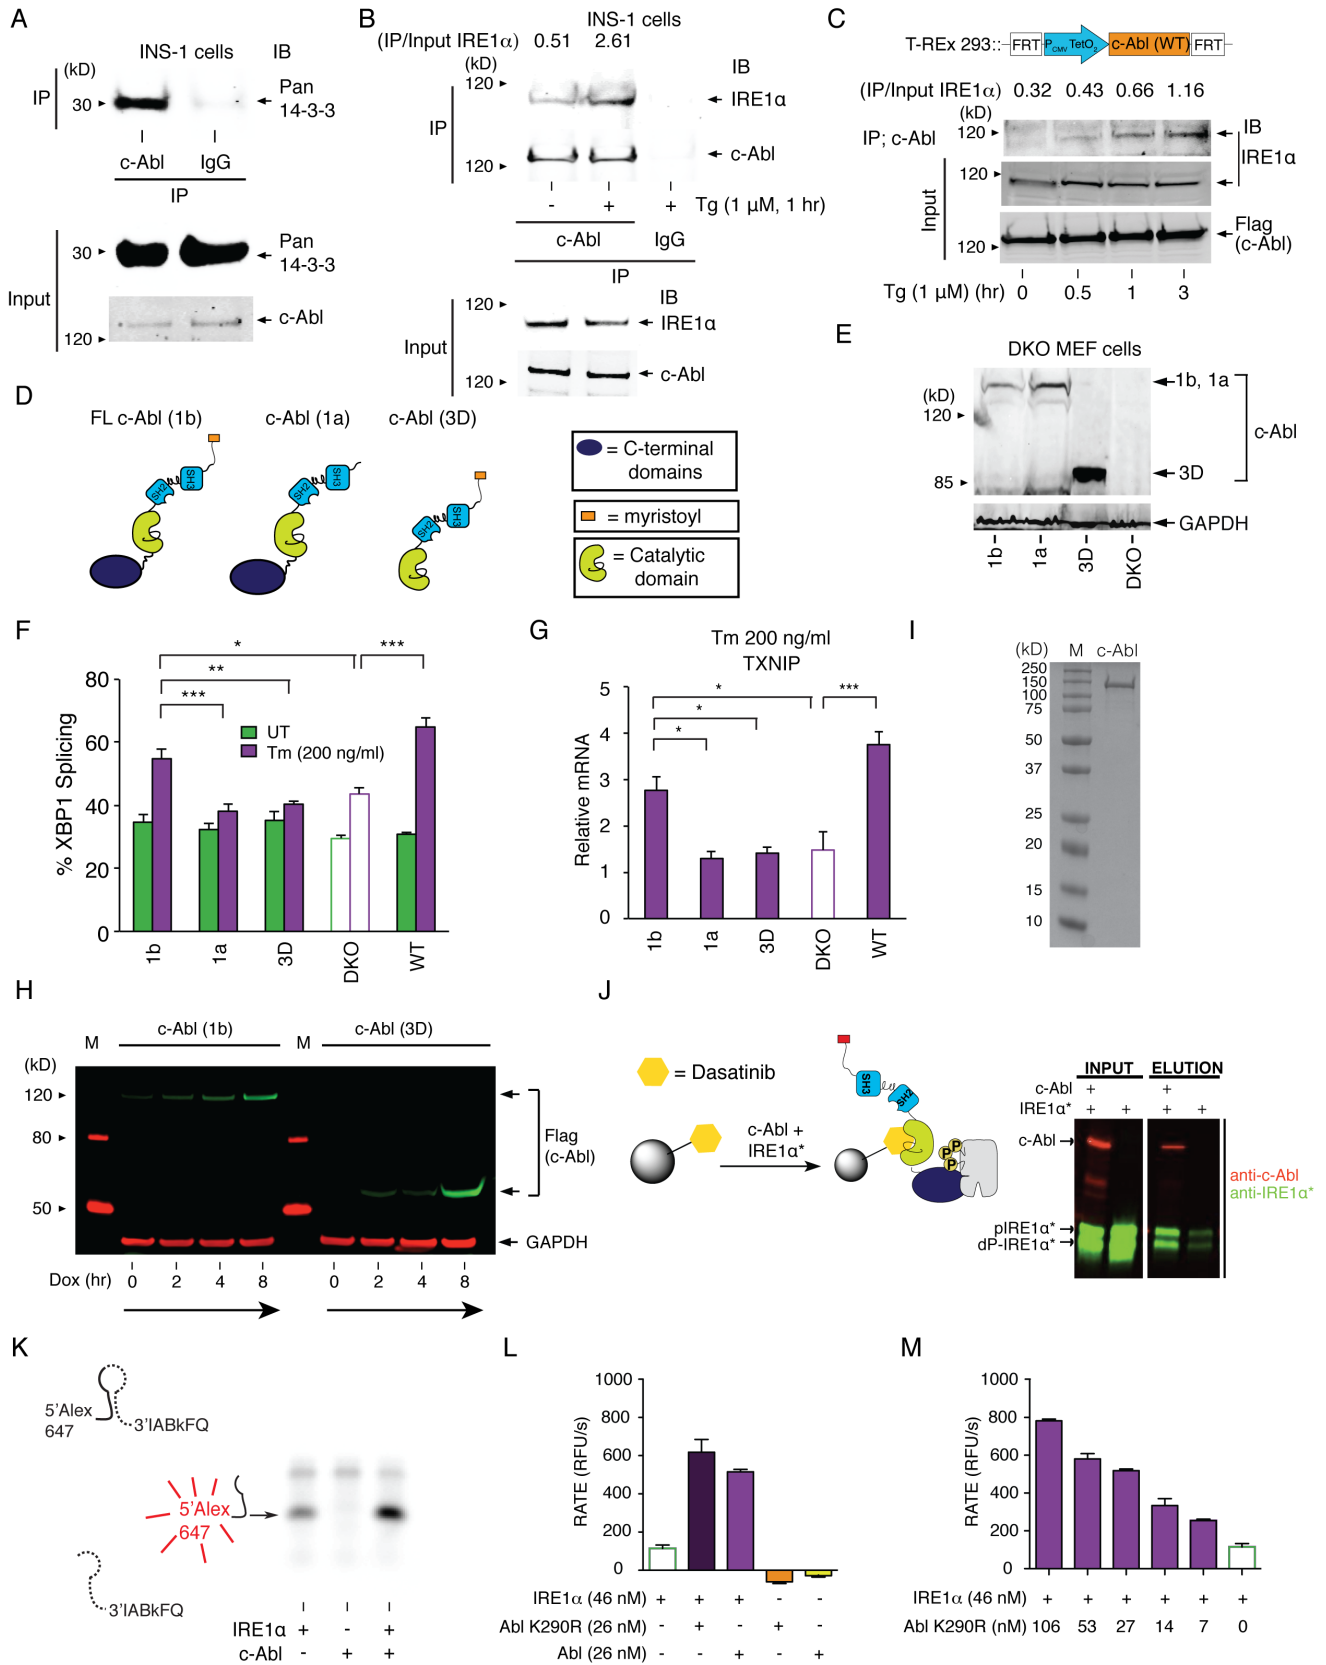

FIGURE S5

**Figure S5. Co-localization of c-Abl with IRE1 $\alpha$  at the ER membrane drives T-UPR endpoints through a scaffolding effect. Related to Figure 4.**

(A) Immunoprecipitation (IP) of c-Abl with blotting for pan 14-3-3 and c-Abl in INS-1 cells. (B) IP of endogenous c-Abl with blotting for endogenous IRE1 $\alpha$  and c-Abl in INS-1 cells with  $\pm$  Tg for 1 hr. (C) IP of c-Abl with blotting for IRE1 $\alpha$  and c-Abl in T-REx 293 cells expressing c-Abl treated with 1  $\mu$ g/ml Dox for 24 hr, followed by Tg for the indicated times. (D) Structures of human FL c-Abl1b, c-Abl1a, and c-Abl(3D). (E) Immunoblots of c-Abl in DKO and DKO MEF cells overexpressing c-Abl (1b, 1a, or 3D)-mCherry (C-terminal tagged). (F) Percent XBP1 splicing of RNA from c-Abl/Arg DKO MEF cells overexpressing c-Abl (1b, 1a, or 3D)-mCherry, c-Abl/Arg DKO, or wild type (WT) MEF cells treated with Tm for 3 hr. Two-way ANOVA followed by post-hoc Tukey's test performed for statistical analysis. Biologically triplicated. (G) qPCR for TXNIP mRNA expressed as a ratio relative to untreated cells in the samples of (F). One-way ANOVA followed by post-hoc Tukey's test was performed for statistical analysis. Biologically triplicated. (H) Immunoblots for indicated proteins in T-REx 293 cells expressing human c-Abl1b or c-Abl(3D) under 1  $\mu$ g/ml Dox for the indicated time. M; protein marker. (I) A coomassie blue-stained gel of the purified c-Abl used in IRE1 $\alpha$ \* auto-phosphorylation experiments. M; protein marker. (J) (Left) A direct interaction between purified IRE1 $\alpha$ \* and purified c-Abl was probed with a pull-down experiment using an immobilized, Abl-selective ATP-competitive inhibitor–Dasatinib. (Right) Immunoblots for total IRE1 $\alpha$  and c-Abl. IRE1 $\alpha$ \* and c-Abl (lane 1) or IRE1 $\alpha$ \* alone (lane 2) were added to immobilized Dasatinib beads. Input shows protein components prior to addition to immobilized Dasatinib. Retained proteins after serial washed with buffer were eluted using SDS. (K) RNase activity of IRE1 $\alpha$ \* (200 ng) in the presence or absence of c-Abl (50 ng) in 15  $\mu$ l incubation volume. The assay was performed for 60 min. The cleaved XBP1 RNA mini-substrate was separated by urea PAGE. (L and M) The rates of XBP1 mini-substrate

cleavage by IRE1 $\alpha$ \* in the absence or presence of either c-Abl or indicated concentration of c-Abl K290R. Triplicated. Bars; mean $\pm$ SEM. P-values: \* < 0.05, \*\* < 0.01, \*\*\* < 0.001.

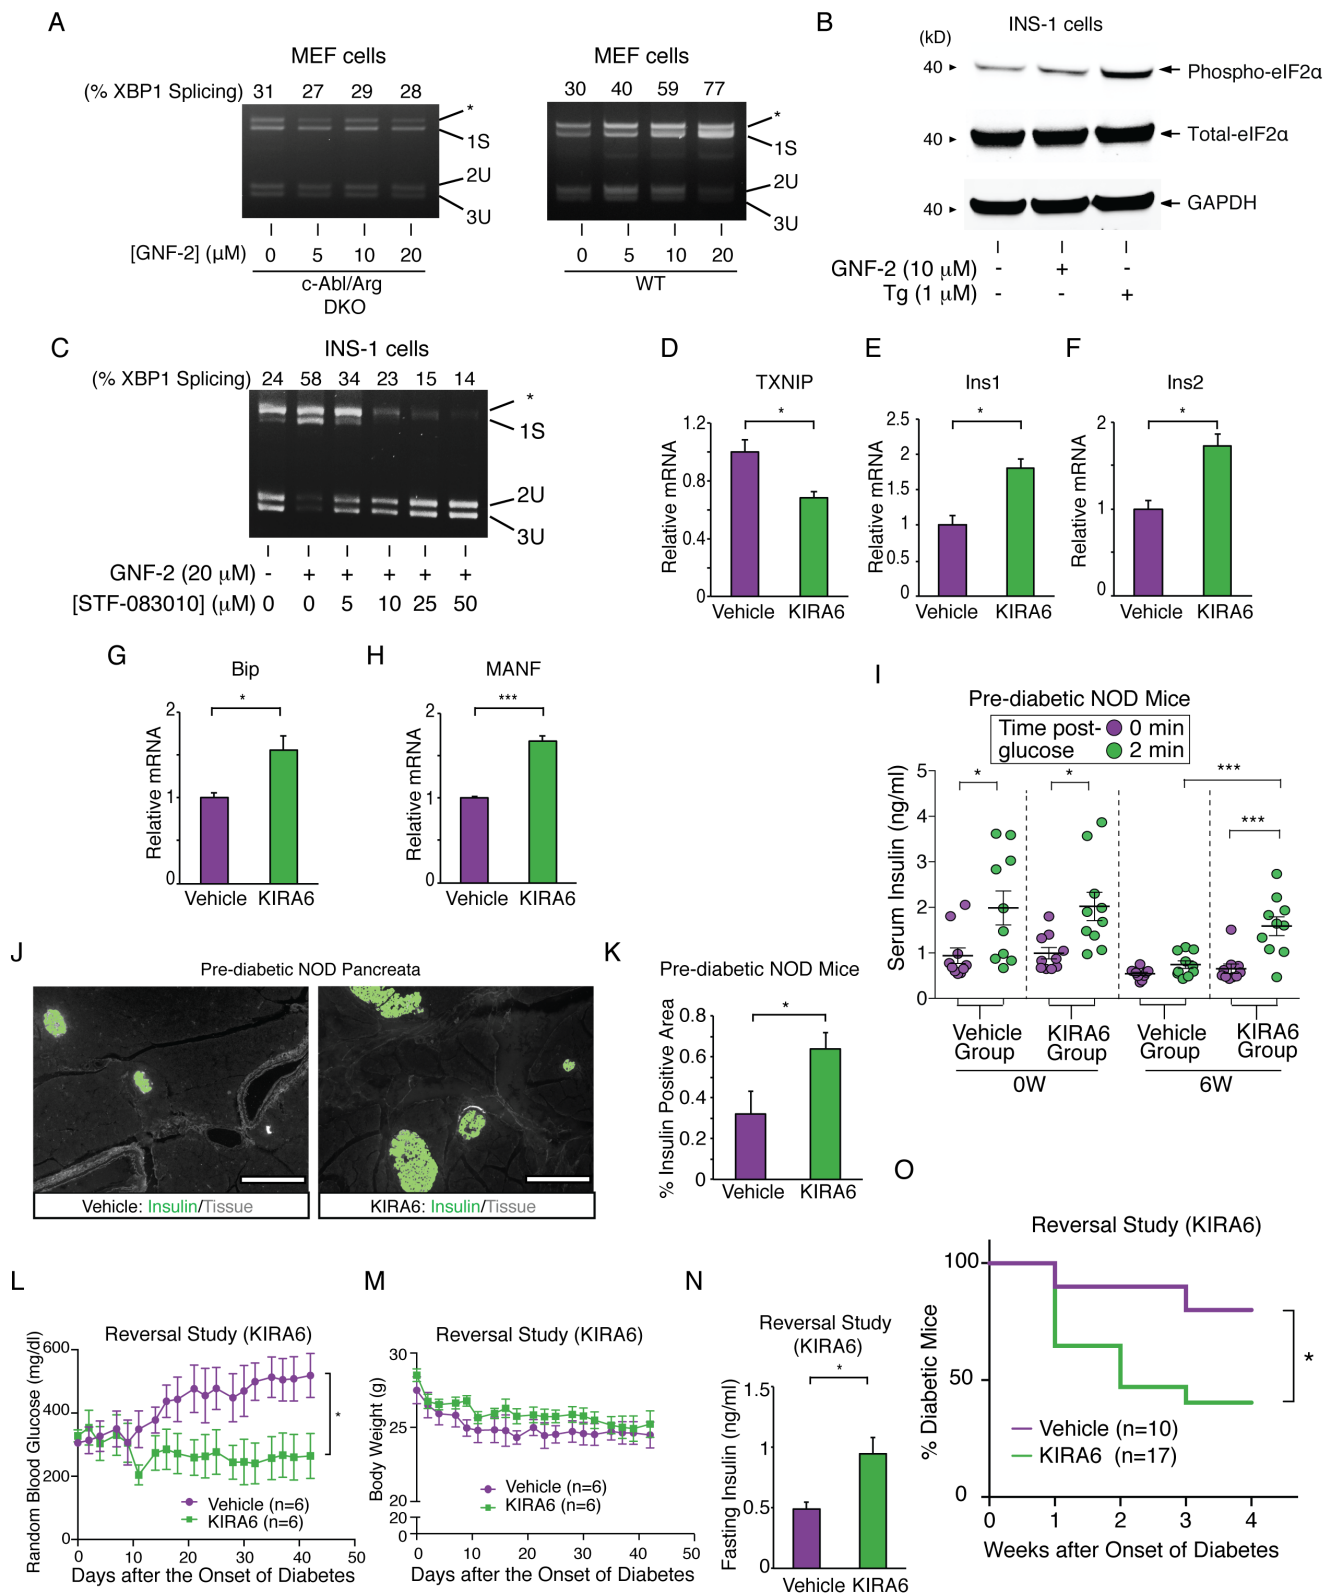

**FIGURE S6**

**Figure S6. Effect of GNF-2 on IRE1 $\alpha$  signaling; and effect of KIRA6 on NOD mice. Related to Figure 5 and 6.**

(A) Agarose gel of PstI-digested XBP1 cDNA amplicons in c-Abl/Arg DKO or wild type (WT) MEF cells treated with the indicated [GNF-2] for 1 hr. (B) Immunoblots for indicated proteins in INS-1 cells treated with or without GNF-2 or Tg for 2 hr. (C) Agarose gel of PstI-digested XBP1 cDNA amplicons in INS-1 cells pretreated with indicated [STF-083010] for 2 hr, followed by GNF-2 for 1 hr. (D-H) qPCR of indicated mRNA levels in islets of female NOD mice injected with either KIRA6 (5 mg/kg body weight) (n=3) or vehicle (n=3) b.i.d. starting at 10 weeks of age. Injections were continued for 7 days after which islets were harvested. (I) First-phase insulin response in pre-diabetic NOD mice before (8 weeks of age, 0W) and after 6 weeks (6W) of i.p. injection with either vehicle or KIRA6 b.i.d. (n=10 per group). Serum insulin levels were quantified by an insulin-specific ELISA. Two-way ANOVA followed by post-hoc Tukey's test was used for statistical analysis. Each symbol denotes an individual mouse. (J and K) Immunofluorescent staining of insulin and quantitation of the insulin-positive area in pancreatic sections prepared from NOD mice treated with vehicle or KIRA6 (5 mg/kg) b.i.d. for 6 weeks starting at 8 weeks of age (n=5 per group). (J) Representative images of the insulin staining (green) and the tissue sectional area (grey). Scale bar, 200  $\mu$ m. (L and M) Random blood glucose measurement (L) and body weight (M) of female NOD mice injected with either KIRA6 (5 mg/kg) (n=6) or vehicle (n=6) b.i.d. starting at the onset of diabetes. Injections were continued for 42 days. Two-way ANOVA was used for difference between groups. (N) Percentages of diabetic NOD mice for KIRA6-treated (n=17) and vehicle-treated (n=10) group. KIRA6 or vehicle treatment was initiated at the onset of hyperglycemia (blood glucose >250 mg/dl). Log-rank test was performed for statistical analysis. Data are cumulative of two independent experiments. (O) Fasting serum insulin levels in

NOD mice 8 weeks after treatment with KIRA6 or vehicle initiated at diabetes onset. n=5 per group.

Bars; mean±SEM. n; number of mice. P-values: \* < 0.05, \*\*\* < 0.001.

A

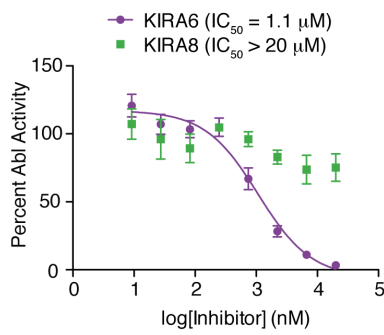

B

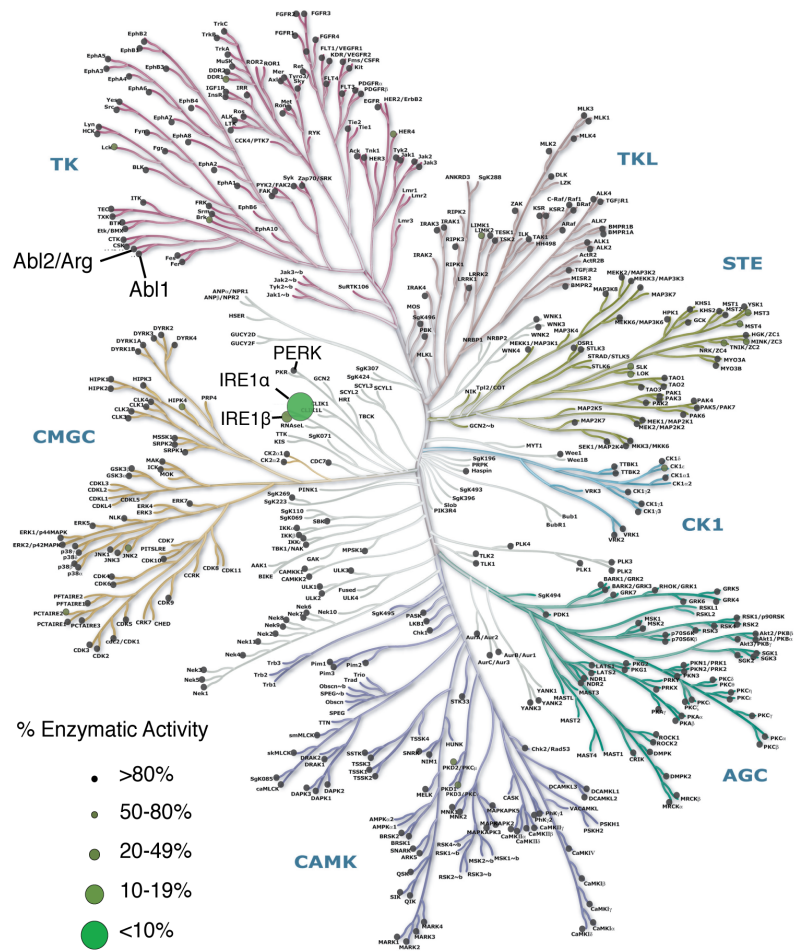

C

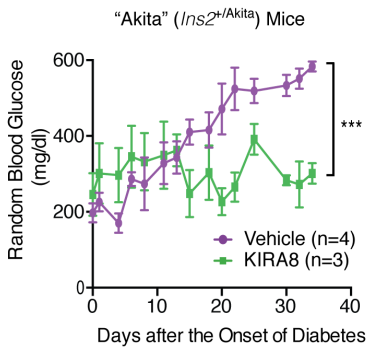

D

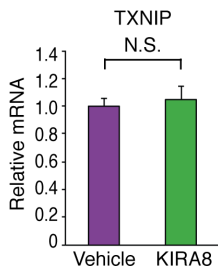

E

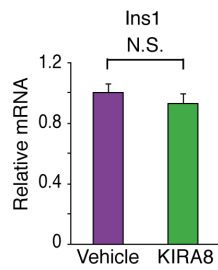

F

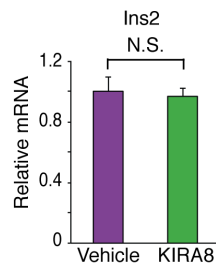

G

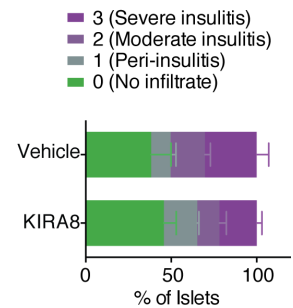

H

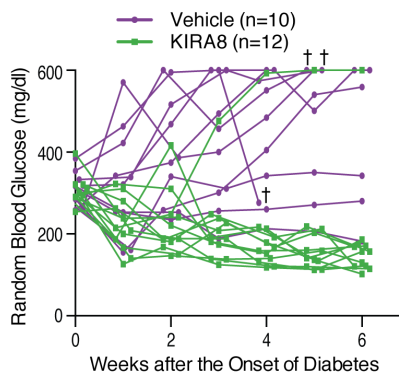

I

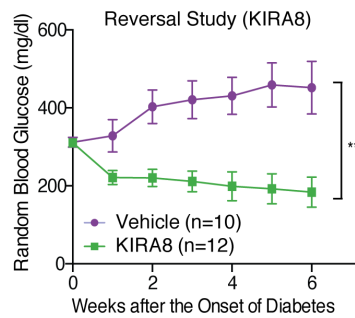

J

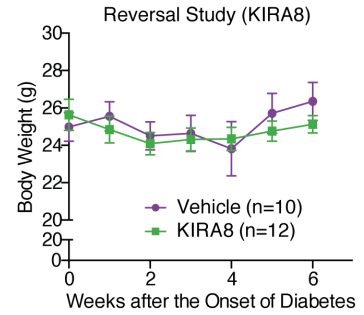

FIGURE S7



**Figure S7. Mono-selective KIRA8 spares  $\beta$ -cells and reverse established diabetes in NOD mice.**

**Related to Figure 6.**

(A) Percent Abl(3D) activity in the presence of indicated [KIRA6] (IC<sub>50</sub> = 1.1  $\mu$ M) and [KIRA8] (IC<sub>50</sub> > 20  $\mu$ M). IC<sub>50</sub> values were determined in the presence of 1 mM ATP. (B) Selectivity of KIRA8 against 365 kinases; 1  $\mu$ M KIRA8 was tested for inhibition of each kinase in duplicate. (C) Random blood glucose levels of male *Ins2<sup>+/-Akita</sup>* mice i.p., injected daily for 35 days with KIRA8 (50 mg/kg) (n=3) or vehicle (n=4) starting at P21 (i.e., day 1). Statistical analysis; repeated measures two-way ANOVA. (D-F) qPCR of indicated mRNA levels in islets of C57BL/6 mice injected with either 50 mg/kg KIRA8 or vehicle, i.p., daily, starting at 10 weeks of age. Injections were continued for 7 days after which islets were harvested. n=3 per group. (G) Quantification of the severity of insulinitis reported as the percentage of islets with a given score. Pre-diabetic NOD mice were analyzed after 6 weeks of i.p. injection with vehicle or KIRA8 (50 mg/kg), daily, starting at 10 weeks of age. At least 60 islets were scored per mouse. n=4 per group. (H-J) Random blood glucose measurement (H and I) and body weight (J) of female NOD mice from survival curves in Figure 6Q (n=12 for KIRA8, n=10 for vehicle group). Injections continued for 6 weeks. (H): Individual measurements. 3 mice in vehicle group with blood glucose levels greater than 600 mg/dl died at 4-5 weeks (shown as †). (I and J): Mean $\pm$ SEM. Two-way ANOVA was used for statistical analysis in (I) and (J). Bars; mean $\pm$ SEM. n; number of mice. P-values: \*\*\* < 0.001.

|                       | $T_{1/2}$ | $T_{max}$ | $C_{max}$ | $AUC_{(0-t)}$ | Plasma level<br>at 4 hr | Plasma level<br>at 6 hr |
|-----------------------|-----------|-----------|-----------|---------------|-------------------------|-------------------------|
|                       | hr        | hr        | ng/ml     | ng/ml*hr      | ng/ml                   | ng/ml                   |
| <b>30 mg/kg, i.p.</b> | 3.49      | 0.25      | 3285      | 9679          | 598                     | 337                     |

**Table S2. Pharmacokinetic profile of KIRA8 in ICR mice after single intraperitoneal injection.**

**Related to Figure 6 and S7.**

The pharmacokinetic profile of KIRA8 was determined in male ICR mice i.p. dosed at 30 mg/kg.

Based on these PK data, daily i.p. doses were chosen for the Akita and NOD model.

|                        | Vehicle<br>(n=10) | Imatinib<br>(n=10) | Vehicle<br>(n=10) | KIRA6<br>(n=17) | Vehicle<br>(n=10) | KIRA8<br>(n=12) |
|------------------------|-------------------|--------------------|-------------------|-----------------|-------------------|-----------------|
| <b>% Diabetic mice</b> | 90                | 20                 | 80                | 41.2            | 90                | 8.3             |

**Table S3. Summary of the effects of small molecules on new-onset diabetes in NOD mice. Related to Figure 1, 6, and S6.**

Percent diabetic mice at 4 weeks after treatment with indicated small molecules used in the reversal studies.
